# Supplementary material
Source: Royal Society of Chemistry journal article supplement (https://www.rsc.org/suppdata/p2/1999/2383/904129j.doc)
Supplement: Supplementary file 1 [file 904129j.doc]

**Table 3** (supplementary material) B3LYP/cc-pVDZ computed harmonic frequencies(cm-1) and infrared intensities(km/mol) of the structures appearing in Table 2.

|  | **1** | |  | **2** | |  | **3** | |  | **4** | |  | **5** | |  | **6** | |  | **7** | |  | **8** | |  |
| --- | --- | --- | --- | --- | --- | --- | --- | --- | --- | --- | --- | --- | --- | --- | --- | --- | --- | --- | --- | --- | --- | --- | --- | --- |
|  | frequency | IR inten | frequency | IR inten | frequency | IR inten | frequency | IR inten | frequency | IR inten | frequency | IR inten | frequency | IR inten | frequency | IR inten |
| 1 | 158.0873 | 1.4915 | 159.0782 | 2.6768 | 153.1557 | 0.4233 | 128.6397 | 0.4952 | 969.7840i | 156.­7543 | 257.7670i | 1.1527 | 433.2708i | 36.7110 | 1153.6224i | 13.­8669 |
| 2 | 159.7570 | 0.0 | 183.7669 | 0.0 | 157.4933 | 2.8795 | 144.5113 | 2.7961 | 166.8158 | 1.0213 | 123.1413 | 1.5154 | 100.3390 | 4.9371 | 115.3632 | 0.8670 |
| 3 | 306.5785 | 7.0934 | 357.8892 | 0.1352 | 336.6675 | 0.2702 | 296.9949 | 1.2606 | 176.1386 | 1.8560 | 172.1163 | 2.3706 | 132.9695 | 4.9371 | 168.1304 | 2.0468 |
| 4 | 337.0987 | 0.1986 | 377.7992 | 0.0 | 348.8427 | 2.6361 | 310.3093 | 2.2846 | 354.9849 | 0.7344 | 240.5920 | 1.1109 | 272.5304 | 4.5847 | 321.2816 | 2.1156 |
| 5 | 386.0728 | 0.0 | 430.4827 | 19.9286 | 420.3615 | 1.7735 | 366.3784 | 5.0577 | 380.4778 | 0.9208 | 324.3000 | 5.3697 | 322.3729 | 3.4122 | 323.2917 | 5.0768 |
| 6 | 406.7549 | 0.1890 | 442.9248 | 0.0 | 473.0944 | 7.0315 | 386.6569 | 1.7174 | 439.8337 | 0.5290 | 425.4956 | 10.2339 | 380.8903 | 9.2947 | 393.0683 | 1.4704 |
| 7 | 497.9060 | 0.2328 | 472.1669 | 0.0 | 479.8088 | 5.9568 | 488.0899 | 1.2937 | 485.9360 | 9.6854 | 430.4138 | 11.3262 | 448.0618 | 6.7182 | 401.5627 | 1.7002 |
| 8 | 499.6443 | 17.4684 | 513.4061 | 0.0 | 508.5572 | 1.4412 | 516.2628 | 8.3943 | 492.1300 | 1.6329 | 511.3559 | 11.8806 | 448.4458 | 13.9407 | 482.1350 | 5.2766 |
| 9 | 571.7524 | 0.1901 | 565.8869 | 0.0 | 528.6839 | 2.1667 | 537.6271 | 10.0009 | 513.9854 | 0.7106 | 541.4605 | 9.0574 | 537.9408 | 1.2086 | 509.8772 | 3.3864 |
| 10 | 687.0510 | 0.0938 | 605.5252 | 8.3071 | 603.1868 | 3.0532 | 619.8251 | 2.4530 | 574.3053 | 1.6974 | 580.0036 | 1.0048 | 569.6439 | 15.3194 | 573.3676 | 0.3704 |
| 11 | 734.6083 | 0.0092 | 757.4904 | 0.0 | 702.3878 | 11.3010 | 698.0310 | 19.1718 | 609.9053 | 0.3114 | 633.8175 | 6.8786 | 598.5103 | 21.8180 | 651.6641 | 1.9437 |
| 12 | 734.6707 | 4.3978 | 763.0786 | 0.0 | 712.7378 | 10.4618 | 722.0953 | 18.3073 | 729.1890 | 5.3278 | 648.4148 | 17.6130 | 701.9014 | 59.2468 | 689.5472 | 28.­7784 |
| 13 | 752.4739 | 0.9245 | 776.2050 | 0.0 | 767.4359 | 4.0227 | 739.0669 | 10.8634 | 745.1065 | 4.1213 | 720.4418 | 5.9457 | 761.3881 | 12.3308 | 696.9973 | 7.6455 |
| 14 | 801.4876 | 71.5403 | 781.6395 | 78.2789 | 771.1013 | 4.0970 | 803.5270 | 33.8412 | 779.7657 | 0.8912 | 760.5268 | 36.8635 | 766.4998 | 33.4142 | 719.1993 | 24.1193 |
| 15 | 843.4467 | 3.4492 | 805.5002 | 0.0085 | 791.3110 | 77.1549 | 841.3906 | 38.9422 | 791.1517 | 51.4784 | 771.6034 | 80.5416 | 790.6004 | 17.8680 | 731.3364 | 9.0759 |
| 16 | 868.5958 | 1.3277 | 883.0544 | 0.0 | 871.0420 | 33.3237 | 862.3279 | 6.0978 | 799.2853 | 47.4826 | 831.7842 | 1.4511 | 811.5126 | 11.1653 | 803.4725 | 39.1315 |
| 17 | 899.7427 | 5.9066 | 936.2812 | 0.0 | 903.8419 | 2.7089 | 886.7590 | 3.4657 | 880.8832 | 4.3633 | 857.2258 | 14.2066 | 877.3482 | 4.2050 | 815.9379 | 23.1259 |
| 18 | 925.6430 | 1.5103 | 949.5599 | 0.0 | 911.1955 | 19.9433 | 934.1552 | 6.5305 | 906.9141 | 4.8382 | 885.6209 | 0.7253 | 922.0461 | 13.1838 | 862.6631 | 2.4904 |
| 19 | 962.1671 | 3.0250 | 988.4080 | 0.0 | 925.0753 | 38.3249 | 961.7943 | 0.9099 | 910.3961 | 9.0655 | 928.8164 | 11.8770 | 942.0131 | 3.8980 | 875.6627 | 0.4929 |
| 20 | 973.9264 | 1.4884 | 1010.­0525 | 1.0925 | 938.7912 | 17.1301 | 979.4420 | 20.3789 | 947.2542 | 3.3220 | 956.2570 | 1.1373 | 953.3257 | 9.8931 | 893.7918 | 8.8353 |
| 21 | 1003.­2254 | 3.6066 | 1032.­5607 | 0.0 | 1015.­6093 | 2.9622 | 1002.­5179 | 4.8920 | 1005.7056 | 0.4424 | 985.3280 | 7.8216 | 989.6540 | 1.1211 | 967.7712 | 3.3664 |
| 22 | 1041.­3391 | 0.0 | 1036.0053 | 0.0 | 1019.­7299 | 0.0438 | 1009.­3347 | 11.5497 | 1025.5300 | 1.2843 | 1000.8635 | 12.4413 | 995.1450 | 0.8019 | 992.05666 | 0.1443 |
| 23 | 1051.4924 | 2.4317 | 1041.0674 | 11.1679 | 1025.2406 | 1.7095 | 1031.1869 | 0.6554 | 1026.5669 | 0.1962 | 1009.3264 | 1.5668 | 1005.2121 | 3.7803 | 1007.2643 | 2.1658 |
| 24 | 1055.9665 | 0.1470 | 1066.4380 | 0.0 | 1032.6419 | 1.1153 | 1033.7691 | 8.2937 | 1038.5459 | 0.2434 | 1018.2187 | 3.8045 | 1029.5386 | 10.3918 | 1027.3559 | 2.5203 |
| 25 | 1070.5503 | 0.0157 | 1115.9847 | 0.0 | 1043.7128 | 1.2398 | 1060.5071 | 50.0324 | 1063.7818 | 0.1582 | 1034.6515 | 4.6540 | 1046.6291 | 15.5223 | 1035.0880 | 0.0910 |
| 26 | 1093.8485 | 5.5264 | 1119.4216 | 3.4967 | 1113.9171 | 2.0539 | 1102.3625 | 2.2196 | 111.2326 | 2.2571 | 1097.9566 | 10.3357 | 1070.1889 | 8.0515 | 1042.2682 | 4.2783 |
| 27 | 1159.8948 | 0.0846 | 1182.4873 | 10.1293 | 1160.9365 | 0.0464 | 1127.9367 | 4.0985 | 1170.0464 | 0.2601 | 1115.3723 | 7.2589 | 1109.6733 | 19.2163 | 1097.3774 | 7.1016 |
| 28 | 1240.4974 | 0.1378 | 1191.5380 | 0.0 | 1173.1111 | 12.5540 | 1166.4108 | 5.0431 | 1172.4733 | 6.9090 | 1161.7483 | 6.0476 | 1130.7354 | 2.8174 | 1179.9235 | 1.2954 |
| 29 | 1256.5253 | 0.7045 | 1231.1750 | 216.­0920 | 1189.8142 | 26.2646 | 1193.5926 | 6.6775 | 1190.6855 | 2.6106 | 1190.3558 | 5.6422 | 1177.4873 | 5.9822 | 1203.7861 | 4.6403 |
| 30 | 1253.1306 | 3.6651 | 1251.8434 | 0.0 | 1221.4272 | 4.7580 | 1240.2033 | 38.5876 | 1250.9715 | 4.7345 | 1198.7222 | 1.1618 | 1220.3046 | .4645 | 1244.8380 | 15.9151 |
| 31 | 1291.4906 | 1.0725 | 1293.5263 | 10.7477 | 1261.9226 | 7.7631 | 1263.9547 | 7.0225 | 1256.3456 | 3.5077 | 1233.8330 | 7.3291 | 1236.5237 | 26.1540 | 1265.1660 | 3.2387 |
| 32 | 1369.9338 | 7.5966 | 1420.8680 | 26.8661 | 1320.5801 | 15.8297 | 1330.8701 | 27.6353 | 1326.4141 | 7.2093 | 1281.4393 | 13.1407 | 1252.4770 | 11.6603 | 1343.6616 | 20.9766 |
| 33 | 1396.8211 | 71.8785 | 1425.4105 | 0.000 | 1352.1605 | 5.4546 | 1352.1829 | 5.8878 | 1370.4684 | 13.1342 | 1334.7623 | 5.2635 | 1329.2513 | 3.2290 | 1347.3016 | 15.4852 |
| 34 | 1429.5466 | 66.5675 | 1430.2122 | 22.8425 | 1411.2372 | 42.3390 | 1400.3567 | 4.8269 | 1401.4428 | 72.2863 | 1362.4913 | 19.2113 | 1364.5251 | 49.1442 | 1388.8168 | 13.9769 |
| 35 | 1471.7966 | 23.9702 | 1460.1558 | 0.0 | 1444.4670 | 206.­3635 | 1435.8129 | 95.7308 | 1436.2016 | 5.6344 | 1416.8601 | 21.9034 | 1411.1590 | 2.7628 | 1431.0794 | 13.7186 |
| 36 | 1478.9162 | 10.6941 | 1490.4379 | 0.0 | 1472.2295 | 128.­7532 | 1473.1119 | 112.­3110 | 1466.1067 | 12.8299 | 1480.5800 | 58.1889 | 1436.5169 | 36.7027 | 1474.3362 | 8.4975 |
| 37 | 1487.2462 | 1.9368 | 1512.5556 | 0.0 | 1516.4761 | 42.3819 | 1514.5136 | 229.­9637 | 1516.3556 | 14.7202 | 1494.8602 | 14.0226 | 1482.7145 | 43.5283 | 1525.7368 | 24.5321 |
| 38 | 1588.4064 | 1.1107 | 1553.6231 | 82.4644 | 1576.4678 | 20.9932 | 1552.7094 | 68.5428 | 1572.7837 | 2.1770 | 1517.6300 | 3.5876 | 1548.1628 | 11.5103 | 1529.2248 | 12.7696 |
| 39 | 1616.3930 | 0.0 | 1569.0591 | 30.1227 | 1642.6881 | 35.2659 | 1625.4264 | 87.3634 | 1602.6557 | 22.8060 | 1604.0543 | 14.1778 | 1572.7183 | 17.4121 | 1597.5060 | 57.3270 |
| 40 | 1634.0820 | 2.7807 | 1631.2739 | 0.0 | 1661.2620 | 58.0559 | 1663.4330 | 67.1937 | 1657.3260 | 8.9943 | 1613.3578 | 10.8028 | 1594.2543 | 43.6726 | 1624.3978 | 7.9937 |
| 41 | 3173.1370 | 0.0005 | 3192.9701 | 0.0 | 2771.3283 | 57.8944 | 2895.3616 | 17.4367 | 2166.2094 | 34.1112 | 3107.0155 | 1.1004 | 3071.0715 | 6.6816 | 2107.2987 | 29.3156 |
| 42 | 3175.2552 | 0.0423 | 3194.8245 | 0.4867 | 3188.2495 | 0.4179 | 3155.5623 | 3.6026 | 3193.8990 | 1.5101 | 3203.1309 | 14.0172 | 3153.2593 | 27.5996 | 3169.3263 | 3.1386 |
| 43 | 3182.3876 | 0.0 | 3195.8842 | 0.4411 | 3193.9230 | 0.8319 | 3166.2759 | 0.1115 | 3197.4891 | 0.6259 | 3208.5432 | 2.1848 | 3178.1556 | 1.2771 | 3172.2458 | 3.2089 |
| 44 | 3191.5657 | 0.0 | 3197.8173 | 0.0 | 3198.6163 | 8.5421 | 3174.0357 | 2.2876 | 3202.1244 | 10.4164 | 3213.9208 | 0.6957 | 3203.5451 | 0.0790 | 3184.8360 | 10.2779 |
| 45 | 3198.6798 | 0.0 | 3209.8621 | 0.0 | 3203.5270 | 0.5472 | 3197.9828 | 1.4492 | 3206.3113 | 0.0869 | 3223.0853 | 2.3716 | 3206.3330 | 5.8735 | 3197.7614 | 3.4166 |
| 46 | 3229.1084 | 0.6066 | 3210.0947 | 1.2250 | 3207.3607 | 5.1139 | 3215.3190 | 1.8737 | 3211.5296 | 13.7823 | 3223.6920 | 5.5997 | 3215.1945 | 2.9032 | 3230.2231 | 0.4953 |
| 47 | 3233.3588 | 2.6352 | 3220.8496 | 3.3849 | 3209.1675 | 3.2672 | 3230.3528 | 4.9191 | 3215.5100 | 2.3716 | 3232.3866 | 2.1916 | 3229.8691 | 6.6023 | 3241.0901 | 8.3588 |
| 48 | 3254.3139 | 9.7211 | 3220.9774 | 0.0 | 3220.5396 | 3.2410 | 3248.7049 | 7.7557 | 3223.3306 | 2.06039 | 3243.4625 | 4.7016 | 3249.4761 | 9.8770 | 3258.5085 | 12.3496 |
